# Supplementary material for: Language and Emotion – A Foosball Study: The Influence of Affective State on Language Production in a Competitive Setting
Source: PLoS One. 2019 May 24;14(5):e0217419. doi: 10.1371/journal.pone.0217419 (PMC6534325; doi:10.1371/journal.pone.0217419)
Supplement: S1 Dataset — (XLSX) [file pone.0217419.s005.xlsx]

## Sheet: Sheet1
Row Labels	Average of Excitement	Average of Happiness	Average of Dejection	Average of Anxiety	Average of Anger
1	3.62838	3.86824	1.07838	1.14865	1.06081
2	3.14865	3.34122	1.28919	1.18378	1.1723
Grand Total	3.38851	3.60473	1.18378	1.16622	1.11655

## Sheet: Sheet6
Round	(Multiple Items)
Row Labels	Average of BIRG	Average of CORF	Average of Het resultaat was een kwestie van geluk.
1	4.42432	1.61622	2.66216
2	3.39459	1.88649	3.04054
Grand Total	3.90946	1.75135	2.85135

## Sheet: Emotions & BIRG_CORF
Participant	Sex	Age	Round	Outcome	Played table soccer before?	How often?	How many of the other participants did you know?	Own teammate?	Onbehaaglijk	Ontdaan	Opgewekt	Geïrriteerd	Tevreden	Gespannen	Verdrietig	Opgewonden	Woedend	Gelukkig	Nerveus	Ongelukkig	Enthousiast	Geërgerd	Vrolijk	Bang	Teleurgesteld	Energiek	Boos	Blij	Angstig	Neerslachtig	Ik vind dat we win999ars zijn	Ik heb persoonlijk het gevoel dat ik heb gewonnen als mijn team heeft gewonnen.	Ik heb gevoelens van succes omdat ons team het goed deed.	Ik ben trots omdat ons team het goed deed.	Ik vind dat mijn teamlid goed gespeeld heeft.	Ik voel me vernederd als ons team verliest.	Ik voel me helemaal niet verbonden met mijn teamlid.	Ik vind dat mijn teamlid slecht gespeeld heeft.	Ik vind mijn teamlid een loser.	Ik vind dat mijn teamlid niet goed gespeeld heeft.	Het resultaat was een kwestie van geluk.	Ik vind dat ik goed gespeeld heb.	Ik vond het spel leuk.	Anxiety	Dejection	Excitement	Anger	Happiness	BIRG
3A	0	18	0	0	0	1	2	1	1	1	3	1	4	1	1	4	1	4	1	1	5	1	4	1	1	4	1	5	1	1	999	999	999	999	999	999	999	999	999	999	999	999	999	1	1	4	1	4.25	999
3A	0	18	1	2	0	1	2	1	1	1	4	1	3	1	1	4	1	4	1	1	4	1	4	1	1	4	1	4	1	1	2	4	2	3	3	2	2	3	2	3	4	3	5	1	1	4	1	3.75	3.14286
3A	0	18	2	2	0	1	2	1	1	1	4	1	4	2	1	1	1	4	1	1	4	1	5	1	1	4	1	4	1	1	3	4	4	3	4	2	2	2	2	2	4	4	4	1.2	1	3.25	1	4.25	3.71429
3B	0	18	0	0	0	3	3	0	1	1	5	1	4	1	1	4	1	5	1	1	5	1	5	1	1	5	1	5	1	1	999	999	999	999	999	999	999	999	999	999	999	999	999	1	1	4.75	1	4.75	999
3B	0	18	1	1	0	3	3	0	1	1	5	1	4	1	1	5	1	5	1	1	5	1	5	1	1	5	1	5	1	1	5	4	5	4	5	2	1	1	1	1	2	5	5	1	1	5	1	4.75	4.71429
3B	0	18	2	1	0	3	3	0	1	1	5	1	5	1	1	5	1	5	1	1	5	1	5	1	1	5	1	5	1	1	5	5	5	5	5	4	1	1	1	1	1	5	5	1	1	5	1	5	5
3C	0	18	0	0	0	1	3	0	2	1	4	1	4	2	1	2	1	4	2	1	4	1	4	1	1	3	1	4	1	1	999	999	999	999	999	999	999	999	999	999	999	999	999	1.6	1	3.25	1	4	999
3C	0	18	1	1	0	1	3	0	1	1	4	2	4	4	1	2	1	4	1	1	4	1	5	1	1	3	1	4	1	1	4	4	4	4	4	1	2	2	1	2	4	4	5	1.6	1	3.25	1.25	4.25	4.14286
3C	0	18	2	1	0	1	3	0	1	1	4	1	1	1	1	4	1	4	1	1	4	1	5	1	1	4	1	4	1	1	4	4	4	4	4	2	2	2	2	2	4	4	5	1	1	4	1	3.5	4.14286
3D	0	18	0	0	0	2	3	0	2	1	1	2	1	1	1	3	1	2	2	1	3	3	2	1	1	3	1	1	1	1	999	999	999	999	999	999	999	999	999	999	999	999	999	1.4	1	2.5	1.75	1.5	999
3D	0	18	1	2	0	2	3	0	1	1	4	2	3	2	1	4	1	3	1	1	4	2	3	1	1	4	1	3	1	1	2	5	1	3	5	2	1	1	1	1	2	1	5	1.2	1	4	1.5	3	3.14286
3D	0	18	2	2	0	2	3	0	1	1	4	1	4	2	1	4	1	3	1	1	4	1	4	1	1	5	1	4	1	1	2	5	4	4	5	1	1	1	1	1	2	4	5	1.2	1	4.25	1	3.75	4.14286
4A	1	24	0	0	0	1	1	1	1	2	4	1	4	2	1	3	1	4	2	1	5	2	4	1	1	4	1	4	1	1	999	999	999	999	999	999	999	999	999	999	999	999	999	1.4	1.2	4	1.25	4	999
4A	1	24	1	1	0	1	1	1	1	3	3	1	3	1	1	3	1	3	2	1	3	1	4	1	1	4	1	4	1	1	5	5	4	4	5	3	3	1	1	1	1	4	5	1.2	1.4	3.25	1	3.5	4.57143
4A	1	24	2	1	0	1	1	1	1	4	3	1	4	2	1	2	1	3	2	1	3	1	3	1	4	1	2	3	1	1	5	4	4	4	5	4	2	1	1	1	1	4	4	1.4	2.2	2.25	1.25	3.25	4.28571
4B	1	22	0	0	0	1	1	1	1	1	3	3	3	2	1	2	1	3	1	1	3	2	3	1	1	3	1	3	1	1	999	999	999	999	999	999	999	999	999	999	999	999	999	1.2	1	2.75	1.75	3	999
4B	1	22	1	2	0	1	1	1	1	2	2	2	1	2	1	3	1	3	1	2	3	2	2	1	2	3	1	3	1	1	1	4	2	1	1	3	4	4	3	5	2	1	3	1.2	1.6	2.75	1.5	2.25	1.85714
4B	1	22	2	2	0	1	1	1	1	2	2	2	2	2	1	1	1	3	1	1	2	2	3	1	2	2	1	2	1	2	1	4	1	1	1	3	4	4	1	4	2	2	4	1.2	1.6	1.75	1.5	2.5	2
4C	1	26	0	0	0	1	1	1	1	1	3	1	5	1	1	3	1	5	1	1	4	1	5	1	1	3	1	5	1	1	999	999	999	999	999	999	999	999	999	999	999	999	999	1	1	3.25	1	5	999
4C	1	26	1	2	0	1	1	1	1	1	3	1	5	1	1	2	1	5	1	1	3	1	4	1	2	4	1	5	1	1	2	5	2	4	4	1	3	1	1	1	3	2	2	1	1.2	3	1	4.75	3
4C	1	26	2	2	0	1	1	1	1	1	3	1	5	1	1	4	1	5	1	1	5	1	5	1	1	3	1	4	1	1	5	5	5	4	5	1	3	1	1	1	5	3	4	1	1	3.75	1	4.75	4.42857
4D	1	21	0	0	0	2	0	1	1	1	3	1	4	1	1	4	1	4	2	1	4	1	5	1	1	4	1	4	1	1	999	999	999	999	999	999	999	999	999	999	999	999	999	1.2	1	3.75	1	4.25	999
4D	1	21	1	1	0	2	0	1	1	1	4	1	5	2	1	5	1	5	1	1	5	1	5	1	1	5	1	5	1	1	5	4	4	4	4	4	1	1	1	1	1	4	4	1.2	1	4.75	1	5	4.14286
4D	1	21	2	1	0	2	0	1	1	1	4	1	5	1	1	4	1	5	1	1	4	1	4	1	1	4	1	4	1	1	2	4	4	4	4	4	2	2	1	1	1	4	4	1	1	4	1	4.5	3.71429
5A	1	21	0	0	0	1	3	0	1	1	3	1	4	1	1	2	1	3	1	1	3	1	3	1	1	4	1	3	1	1	999	999	999	999	999	999	999	999	999	999	999	999	999	1	1	3	1	3.25	999
5A	1	21	1	2	0	1	3	0	1	1	4	1	4	1	1	2	1	3	1	1	3	1	3	1	1	3	1	3	1	1	3	3	3	4	4	3	3	1	1	1	2	4	5	1	1	3	1	3.25	3.71429
5A	1	21	2	2	0	1	3	0	1	1	3	1	4	1	1	3	1	3	1	1	3	1	3	1	1	3	1	3	1	1	3	2	3	4	4	2	3	1	1	2	1	4	5	1	1	3	1	3.25	3.57143
5B	1	20	0	0	0	1	3	0	3	2	3	1	3	2	1	2	1	3	2	1	3	1	2	1	1	2	1	3	1	2	999	999	999	999	999	999	999	999	999	999	999	999	999	1.8	1.4	2.5	1	2.75	999
5B	1	20	1	1	0	1	3	0	1	1	2	1	3	1	1	3	1	3	1	1	4	1	4	1	1	3	1	4	1	1	4	4	4	4	5	2	1	1	1	1	4	4	5	1	1	3	1	3.5	4.28571
5B	1	20	2	1	0	1	3	0	1	1	3	1	4	1	1	3	1	4	1	1	4	1	4	1	1	3	1	4	1	1	4	4	4	4	5	2	1	1	1	1	4	4	5	1	1	3.25	1	4	4.28571
5C	1	20	0	0	0	3	3	0	4	4	5	1	4	4	1	5	1	3	4	3	4	1	4	1	1	4	1	5	1	1	999	999	999	999	999	999	999	999	999	999	999	999	999	2.8	2	4.5	1	4	999
5C	1	20	1	1	0	3	3	0	4	4	5	1	5	4	1	5	1	5	2	1	5	1	5	1	1	5	1	5	1	1	5	5	5	5	5	4	2	1	1	1	4	4	5	2.4	1.6	5	1	5	4.85714
5C	1	20	2	1	0	3	3	0	4	4	5	1	5	1	1	5	1	5	1	1	5	1	5	1	1	5	1	5	1	1	5	5	5	5	5	2	2	1	1	1	2	5	5	1.6	1.6	5	1	5	5
5D	1	21	0	0	0	1	3	0	1	1	3	1	5	1	1	3	1	5	1	1	2	1	3	1	1	2	1	3	1	1	999	999	999	999	999	999	999	999	999	999	999	999	999	1	1	2.5	1	4	999
5D	1	21	1	2	0	1	3	0	1	1	4	1	5	1	1	4	1	5	1	1	3	1	4	1	1	3	1	4	1	1	5	5	3	5	5	1	1	1	1	1	5	5	5	1	1	3.5	1	4.5	4.71429
5D	1	21	2	2	0	1	3	0	1	1	4	1	4	1	1	3	1	5	1	1	3	1	4	1	1	2	1	4	1	1	5	5	5	5	5	1	1	1	1	1	5	5	5	1	1	3	1	4.25	5
6A	0	19	0	0	0	3	1	1	2	2	3	1	3	1	1	3	1	3	2	2	2	1	3	1	1	3	1	3	1	1	999	999	999	999	999	999	999	999	999	999	999	999	999	1.4	1.4	2.75	1	3	999
6A	0	19	1	1	0	3	1	1	1	1	4	1	3	1	1	2	1	3	1	1	2	1	3	1	1	3	1	4	1	1	2	3	2	3	5	1	2	1	1	1	4	4	4	1	1	2.75	1	3.25	3.28571
6A	0	19	2	1	0	3	1	1	1	1	1	1	2	1	1	2	1	3	1	1	2	1	3	1	1	2	1	4	1	1	3	3	2	3	2	2	2	1	1	1	4	4	4	1	1	1.75	1	3	3
6B	0	24	0	0	0	1	0	1	1	1	2	1	3	1	1	1	1	3	2	1	2	1	3	1	1	2	1	2	1	1	999	999	999	999	999	999	999	999	999	999	999	999	999	1.2	1	1.75	1	2.75	999
6B	0	24	1	2	0	1	0	1	1	1	2	2	2	2	1	2	1	2	1	1	2	2	2	1	2	2	1	2	1	1	2	4	2	2	4	4	4	2	3	2	2	2	4	1.2	1.2	2	1.5	2	2.85714
6B	0	24	2	2	0	1	0	1	1	1	1	1	2	1	1	2	1	2	1	1	1	1	2	1	2	1	1	2	1	1	2	4	2	4	2	2	5	4	2	4	2	4	4	1	1.2	1.25	1	2	3.14286
6C	0	19	0	0	0	2	1	1	1	1	5	2	4	2	1	4	2	4	3	1	5	2	4	2	1	4	1	4	1	1	999	999	999	999	999	999	999	999	999	999	999	999	999	1.8	1	4.5	1.75	4	999
6C	0	19	1	2	0	2	1	1	2	3	4	2	4	2	1	4	2	4	1	2	4	3	4	1	2	4	1	3	1	2	2	5	2	3	4	4	4	4	1	4	3	5	5	1.4	2	4	2	3.75	3.71429
6C	0	19	2	2	0	2	1	1	1	1	4	1	2	1	2	4	1	3	1	1	3	1	4	2	3	4	2	3	1	1	3	4	2	3	4	1	2	2	1	2	3	3	4	1.2	1.6	3.75	1.25	3	3.28571
7A	0	18	0	0	0	3	3	0	1	1	2	1	3	1	1	2	1	4	1	1	2	1	3	1	1	2	1	2	1	1	999	999	999	999	999	999	999	999	999	999	999	999	999	1	1	2	1	3	999
7A	0	18	1	2	0	3	3	0	1	2	3	1	2	1	1	3	1	3	1	1	3	2	3	1	2	2	1	2	1	1	2	4	2	2	4	2	2	2	1	2	5	3	5	1	1.4	2.75	1.25	2.5	3.14286
7A	0	18	2	1	0	3	3	0	1	1	4	1	4	1	1	4	1	3	1	1	4	1	3	1	1	3	1	3	1	1	5	5	5	5	4	2	2	1	1	2	2	5	5	1	1	3.75	1	3.25	4.85714
7B	0	19	0	0	0	1	2	1	1	1	2	1	2	1	1	1	1	3	2	1	2	1	2	1	1	1	1	2	1	1	999	999	999	999	999	999	999	999	999	999	999	999	999	1.2	1	1.5	1	2.25	999
7B	0	19	1	1	0	1	2	1	1	1	2	1	2	1	1	1	1	2	1	1	2	1	2	1	1	1	1	2	1	1	5	5	4	3	5	1	1	2	1	1	4	2	5	1	1	1.5	1	2	4.14286
7B	0	19	2	2	0	1	2	1	1	1	1	1	1	1	1	1	1	2	1	1	1	1	2	1	1	1	1	1	1	1	2	4	3	5	4	1	2	1	1	4	4	2	4	1	1	1	1	1.5	3.42857
7C	0	19	0	0	0	2	3	0	1	1	4	2	2	2	1	4	1	5	4	1	4	2	4	1	2	4	1	5	1	1	999	999	999	999	999	999	999	999	999	999	999	999	999	1.8	1.2	4	1.5	4	999
7C	0	19	1	1	0	2	3	0	1	1	5	1	4	3	1	4	1	5	2	1	5	1	5	1	1	5	1	5	1	1	5	5	5	5	5	1	2	1	1	1	5	5	5	1.6	1	4.75	1	4.75	5
7C	0	19	2	2	0	2	3	0	1	4	2	5	2	2	1	3	1	5	1	1	2	1	4	1	4	2	4	2	1	4	1	1	1	1	1	1	4	5	1	1	2	2	1	1.2	2.8	2.25	2.75	3.25	1.14286
7D	0	18	0	0	0	2	2	1	3	3	4	2	4	3	2	2	2	3	2	2	3	3	3	2	2	3	2	3	2	2	999	999	999	999	999	999	999	999	999	999	999	999	999	2.4	2.2	3	2.25	3.25	999
7D	0	18	1	2	0	2	2	1	3	2	2	2	2	3	3	2	3	3	3	3	2	4	3	3	3	3	4	3	4	4	4	4	3	4	4	2	3	2	2	2	4	4	4	3.2	3	2.25	3.25	2.75	3.85714
7D	0	18	2	1	0	2	2	1	1	2	4	4	3	2	2	3	2	3	2	2	3	2	3	2	2	3	2	3	2	3	5	5	5	4	5	1	4	1	1	5	1	5	5	1.8	2.2	3.25	2.5	3	4.85714
8A	1	20	0	0	0	3	2	0	1	1	5	1	4	2	1	4	1	4	1	1	4	1	4	1	1	4	1	4	1	1	999	999	999	999	999	999	999	999	999	999	999	999	999	1.2	1	4.25	1	4	999
8A	1	20	1	1	0	3	2	0	1	1	4	1	4	1	1	3	1	4	1	1	4	1	4	1	1	4	1	4	1	1	5	2	4	4	4	4	1	2	1	2	2	4	5	1	1	3.75	1	4	4
8A	1	20	2	2	0	3	2	0	1	3	3	1	4	1	1	4	1	4	1	1	4	1	4	1	2	3	1	4	1	1	4	2	4	2	4	2	1	2	1	2	2	3	5	1	1.6	3.5	1	4	3.42857
8B	1	24	0	0	0	2	0	1	1	1	4	1	4	1	1	2	1	4	1	1	4	1	5	1	1	4	1	4	1	1	999	999	999	999	999	999	999	999	999	999	999	999	999	1	1	3.5	1	4.25	999
8B	1	24	1	2	0	2	0	1	1	1	4	1	4	1	1	5	1	5	1	1	4	1	4	1	1	5	1	5	1	1	3	3	3	3	4	1	2	2	1	1	1	3	5	1	1	4.5	1	4.5	3.42857
8B	1	24	2	1	0	2	0	1	1	1	5	1	5	1	1	5	1	4	1	1	4	1	4	1	1	4	1	5	1	1	4	4	4	4	4	1	1	1	1	2	4	4	5	1	1	4.5	1	4.5	4.14286
8C	1	21	0	0	0	1	2	1	1	1	2	1	3	2	1	2	1	4	3	1	3	1	3	1	1	4	1	3	1	1	999	999	999	999	999	999	999	999	999	999	999	999	999	1.6	1	2.75	1	3.25	999
8C	1	21	1	2	0	1	2	1	2	2	4	3	3	4	1	3	1	3	3	1	4	2	2	1	2	4	1	3	1	2	2	5	2	2	4	3	4	3	2	2	2	1	4	2.2	1.6	3.75	1.75	2.75	2.85714
8C	1	21	2	1	0	1	2	1	1	1	4	1	4	4	1	4	1	4	1	1	4	1	4	1	1	4	1	5	1	1	5	5	5	5	3	3	2	2	3	3	1	5	5	1.6	1	4	1	4.25	4.71429
8D	1	20	0	0	0	2	2	0	2	1	4	1	5	1	1	4	1	3	1	1	5	2	4	2	1	4	1	4	1	1	999	999	999	999	999	999	999	999	999	999	999	999	999	1.4	1	4.25	1.25	4	999
8D	1	20	1	1	0	2	2	0	1	1	5	2	4	2	1	4	1	4	2	1	5	2	4	1	1	5	1	4	1	1	5	5	4	5	5	4	1	1	1	1	1	4	5	1.4	1	4.75	1.5	4	4.71429
8D	1	20	2	2	0	2	2	0	1	4	3	2	2	1	1	4	2	2	1	2	3	2	2	1	4	4	3	3	1	1	4	5	1	3	4	4	2	2	2	2	5	1	5	1	2.4	3.5	2.25	2.25	3.28571
9A	0	18	0	0	0	2	3	0	1	1	4	1	4	3	1	4	1	3	3	1	4	1	4	2	1	3	1	4	2	1	999	999	999	999	999	999	999	999	999	999	999	999	999	2.2	1	3.75	1	3.75	999
9A	0	18	1	1	0	2	3	0	1	1	4	1	4	1	1	4	1	3	2	1	4	1	4	1	1	3	1	4	1	1	4	4	4	4	4	2	1	1	1	1	3	4	5	1.2	1	3.75	1	3.75	4.14286
9A	0	18	2	1	0	2	3	0	1	1	4	1	4	1	1	4	1	3	1	1	4	1	4	1	1	3	1	4	1	1	4	4	4	4	5	2	1	1	2	1	3	4	5	1	1	3.75	1	3.75	4.28571
9B	0	18	0	0	0	1	3	0	1	1	3	2	3	2	1	1	1	3	1	2	1	2	3	1	4	2	1	3	1	1	999	999	999	999	999	999	999	999	999	999	999	999	999	1.2	1.8	1.75	1.5	3	999
9B	0	18	1	2	0	1	3	0	1	1	3	1	3	1	1	2	1	3	1	2	2	2	4	1	2	3	1	2	1	1	1	4	2	3	2	1	3	4	2	2	3	3	5	1	1.4	2.5	1.25	3	2.85714
9B	0	18	2	2	0	1	3	0	1	1	3	1	3	1	1	2	1	3	1	2	3	1	4	1	2	3	1	2	1	1	1	5	4	4	3	1	2	3	2	3	4	4	5	1	1.4	2.75	1	3	3.71429
9C	0	18	0	0	0	2	3	0	1	1	2	1	4	1	1	2	1	3	2	1	2	1	3	1	1	2	1	4	1	1	999	999	999	999	999	999	999	999	999	999	999	999	999	1.2	1	2	1	3.5	999
9C	0	18	1	2	0	2	3	0	1	1	3	1	3	1	1	3	1	2	1	1	3	1	4	1	1	4	1	4	1	1	4	3	4	4	5	1	1	1	1	1	4	5	5	1	1	3.25	1	3.25	4.28571
9C	0	18	2	2	0	2	3	0	1	1	3	1	4	1	1	3	1	3	1	1	3	1	4	1	1	3	1	4	1	1	3	2	4	4	4	1	1	1	1	1	4	5	5	1	1	3	1	3.75	3.85714
9D	0	18	0	0	0	1	3	0	1	1	5	1	4	3	1	4	1	4	3	1	5	1	4	2	1	5	1	4	1	1	999	999	999	999	999	999	999	999	999	999	999	999	999	2	1	4.75	1	4	999
9D	0	18	1	1	0	1	3	0	1	1	5	1	5	2	1	5	1	5	2	1	5	1	4	1	1	5	1	5	1	1	5	5	5	5	5	4	1	1	1	1	2	4	5	1.4	1	5	1	4.75	4.85714
9D	0	18	2	1	0	1	3	0	1	1	4	1	5	1	1	4	1	4	1	1	4	1	5	1	1	4	1	5	1	1	5	5	5	5	5	4	1	1	1	1	2	4	5	1	1	4	1	4.75	4.85714
10A	0	18	0	0	0	3	1	1	1	1	3	1	4	1	1	2	1	4	1	1	3	1	2	1	1	2	1	4	1	1	999	999	999	999	999	999	999	999	999	999	999	999	999	1	1	2.5	1	3.5	999
10A	0	18	1	1	0	3	1	1	1	1	3	1	3	1	1	2	1	4	1	1	3	1	2	1	1	2	1	3	1	1	5	5	5	4	5	2	3	1	1	5	3	4	4	1	1	2.5	1	3	4.57143
10A	0	18	2	1	0	3	1	1	1	1	2	1	3	1	1	1	1	4	1	1	2	1	2	1	1	2	1	3	1	1	5	5	4	4	5	1	3	1	1	1	2	4	5	1	1	1.75	1	3	4.57143
10B	0	18	0	0	0	1	1	1	1	1	2	1	3	1	1	2	1	3	1	1	2	1	2	1	1	2	1	2	1	1	999	999	999	999	999	999	999	999	999	999	999	999	999	1	1	2	1	2.5	999
10B	0	18	1	2	0	1	1	1	1	2	3	1	1	2	1	3	1	2	1	1	3	1	3	1	3	3	1	2	1	1	1	4	1	1	2	1	4	2	1	3	1	1	5	1.2	1.6	3	1	2	2.14286
10B	0	18	2	2	0	1	1	1	1	2	4	1	3	1	1	3	1	3	1	1	3	1	3	1	2	2	1	2	1	1	3	4	3	4	4	2	2	2	1	1	4	4	5	1	1.4	3	1	2.75	3.85714
10C	0	29	0	0	0	1	1	1	1	1	3	1	3	1	1	1	1	2	1	1	1	1	2	1	1	1	1	1	1	1	999	999	999	999	999	999	999	999	999	999	999	999	999	1	1	1.5	1	2	999
10C	0	29	1	2	0	1	1	1	1	1	2	1	3	1	1	1	1	3	1	1	3	1	3	1	1	2	1	1	1	1	1	5	1	3	5	3	3	1	1	1	1	1	5	1	1	2	1	2.5	3
10C	0	29	2	2	0	1	1	1	1	1	3	1	3	1	1	2	1	3	1	1	3	1	3	1	1	2	1	3	1	1	5	5	4	5	5	3	2	1	1	1	1	4	5	1	1	2.5	1	3	4.71429
10D	0	20	0	0	0	1	1	1	2	2	3	1	4	2	1	2	1	4	2	1	3	1	4	1	1	3	1	4	1	2	999	999	999	999	999	999	999	999	999	999	999	999	999	1.6	1.4	2.75	1	4	999
10D	0	20	1	1	0	1	1	1	2	1	3	1	4	2	1	2	1	4	2	1	3	1	5	1	1	3	1	4	1	1	4	3	4	4	5	3	3	1	1	1	2	4	4	1.6	1	2.75	1	4.25	4
10D	0	20	2	1	0	1	1	1	1	1	3	1	4	3	2	4	1	4	1	1	3	1	4	1	1	4	1	5	1	1	5	4	3	4	5	2	2	1	1	1	3	4	4	1.4	1.2	3.5	1	4.25	4.14286
11A	0	19	0	0	0	2	3	0	2	1	4	1	3	1	1	1	1	3	2	1	3	1	3	1	1	3	1	3	1	1	999	999	999	999	999	999	999	999	999	999	999	999	999	1.4	1	2.75	1	3	999
11A	0	19	1	2	0	2	3	0	1	1	4	1	4	1	1	4	1	4	1	1	4	1	4	1	1	4	1	4	1	1	3	5	3	3	4	3	2	2	1	2	3	3	5	1	1	4	1	4	3.71429
11A	0	19	2	2	0	2	3	0	1	1	3	1	3	1	1	3	1	3	1	1	3	1	4	1	1	4	1	4	1	1	3	5	3	3	4	2	2	1	1	2	3	4	5	1	1	3.25	1	3.5	3.85714
11B	0	18	0	0	0	1	3	0	2	1	3	1	4	2	1	3	1	4	1	1	3	1	4	1	1	3	1	4	1	1	999	999	999	999	999	999	999	999	999	999	999	999	999	1.4	1	3	1	4	999
11B	0	18	1	1	0	1	3	0	1	1	4	1	5	1	1	5	1	3	1	1	4	1	5	1	1	4	1	4	1	1	4	1	4	4	5	1	1	1	1	1	4	3	4	1	1	4.25	1	4.25	3.57143
11B	0	18	2	1	0	1	3	0	1	1	4	1	5	1	1	4	1	4	1	1	4	1	5	1	1	4	1	5	1	1	5	1	5	5	5	1	1	1	1	1	4	3	4	1	1	4	1	4.75	4
11C	0	19	0	0	0	3	3	0	1	1	4	1	3	1	1	1	1	3	1	1	1	1	3	1	1	1	1	3	1	1	999	999	999	999	999	999	999	999	999	999	999	999	999	1	1	1.75	1	3	999
11C	0	19	1	1	0	3	3	0	1	1	5	1	5	1	1	5	1	4	1	1	4	1	4	1	1	4	1	5	1	1	5	5	5	5	5	2	4	1	1	1	1	5	5	1	1	4.5	1	4.5	5
11C	0	19	2	1	0	3	3	0	1	1	5	1	5	1	1	5	1	5	1	1	5	1	5	1	1	5	1	5	1	1	5	5	5	5	5	1	2	1	1	1	1	5	5	1	1	5	1	5	5
11D	0	21	0	0	0	1	3	0	1	1	3	1	4	1	1	3	1	3	1	1	3	1	3	1	1	3	1	3	1	1	999	999	999	999	999	999	999	999	999	999	999	999	999	1	1	3	1	3.25	999
11D	0	21	1	2	0	1	3	0	1	1	3	1	3	1	1	3	1	3	1	1	3	1	3	1	1	3	1	3	1	1	5	3	2	3	3	4	4	3	1	2	5	4	5	1	1	3	1	3	3.57143
11D	0	21	2	2	0	1	3	0	1	1	3	1	3	1	1	3	1	3	1	1	3	1	3	1	1	3	1	3	1	1	5	3	5	5	5	1	3	2	1	1	4	4	5	1	1	3	1	3	4.57143
12A	1	19	0	0	0	2	0	1	1	1	4	1	4	3	1	3	1	3	3	1	3	1	4	1	1	4	1	4	1	1	999	999	999	999	999	999	999	999	999	999	999	999	999	1.8	1	3.5	1	3.75	999
12A	1	19	1	1	0	2	0	1	1	1	5	1	4	2	1	4	1	4	1	1	4	1	5	1	1	4	1	5	1	1	4	4	4	5	5	1	2	1	1	1	4	4	5	1.2	1	4.25	1	4.5	4.42857
12A	1	19	2	2	0	2	0	1	1	1	5	1	4	1	1	4	1	4	1	1	5	1	5	1	1	4	1	5	1	1	5	4	5	5	5	1	2	1	1	1	2	4	5	1	1	4.5	1	4.5	4.71429
12B	1	40	0	0	0	1	0	1	1	1	3	1	3	2	1	2	1	4	2	1	3	1	4	1	1	3	1	3	1	1	999	999	999	999	999	999	999	999	999	999	999	999	999	1.4	1	2.75	1	3.5	999
12B	1	40	1	2	0	1	0	1	1	1	4	1	3	2	1	3	1	4	1	1	4	2	3	1	2	3	1	3	1	1	3	4	2	2	3	3	2	4	3	4	2	2	4	1.2	1.2	3.5	1.25	3.25	2.85714
12B	1	40	2	1	0	1	0	1	1	1	4	1	3	1	1	3	1	4	1	1	3	1	4	1	1	3	1	3	1	1	3	3	3	3	2	2	2	2	3	1	4	4	4	1	1	3.25	1	3.5	3.14286
12C	1	22	0	0	0	1	0	1	1	1	3	1	3	1	1	1	1	4	1	1	4	1	4	1	1	5	1	4	1	1	999	999	999	999	999	999	999	999	999	999	999	999	999	1	1	3.25	1	3.75	999
12C	1	22	1	2	0	1	0	1	1	1	3	1	3	1	1	3	1	4	1	1	4	1	4	1	1	5	1	4	1	1	3	2	2	3	4	1	3	1	1	2	1	2	4	1	1	3.75	1	3.75	2.85714
12C	1	22	2	1	0	1	0	1	1	1	4	1	4	1	1	4	1	4	1	1	3	1	4	1	1	4	1	4	1	1	4	4	3	4	5	1	3	1	1	1	5	3	4	1	1	3.75	1	4	3.85714
12D	1	24	0	0	0	1	0	1	2	1	3	1	3	1	1	2	1	2	1	2	3	1	2	1	1	2	1	2	1	1	999	999	999	999	999	999	999	999	999	999	999	999	999	1.2	1.2	2.5	1	2.25	999
12D	1	24	1	1	0	1	0	1	1	1	3	1	3	1	1	2	1	2	1	2	3	1	4	1	1	2	1	3	1	1	5	4	4	4	5	2	2	1	1	1	4	4	4	1	1.2	2.5	1	3	4.28571
12D	1	24	2	2	0	1	0	1	1	1	3	1	3	1	1	3	1	2	1	2	4	1	4	1	1	3	1	4	1	1	4	4	4	4	5	2	2	1	1	1	4	3	5	1	1.2	3.25	1	3.25	4.14286
13A	1	24	0	0	0	1	3	0	1	1	4	1	4	3	1	4	1	4	3	1	4	1	4	1	1	5	1	4	1	1	999	999	999	999	999	999	999	999	999	999	999	999	999	1.8	1	4.25	1	4	999
13A	1	24	1	1	0	1	3	0	1	1	4	1	4	2	1	5	1	4	1	1	5	1	4	1	1	4	1	4	1	1	5	4	4	4	4	4	2	2	2	2	2	4	5	1.2	1	4.5	1	4	4.28571
13A	1	24	2	2	0	1	3	0	1	3	4	1	4	1	1	4	1	4	1	1	4	1	4	1	3	4	1	4	1	1	4	4	2	4	4	4	2	2	2	3	4	3	5	1	1.8	4	1	4	3.71429
13B	1	23	0	0	0	2	3	0	1	1	3	1	3	1	1	3	1	3	1	1	4	1	3	1	1	4	1	3	1	1	999	999	999	999	999	999	999	999	999	999	999	999	999	1	1	3.5	1	3	999
13B	1	23	1	2	0	2	3	0	1	2	3	1	2	1	1	2	1	2	1	1	4	1	3	1	1	4	1	3	1	1	5	4	2	3	2	4	2	1	1	4	5	4	5	1	1.2	3.25	1	2.5	3.57143
13B	1	23	2	1	0	2	3	0	1	1	3	1	4	1	1	3	1	4	1	1	3	1	3	1	1	4	1	3	1	1	5	5	5	5	3	4	2	3	1	3	1	5	5	1	1	3.25	1	3.5	4.71429
13C	1	24	0	0	0	1	3	0	1	1	3	1	4	1	1	3	1	5	1	1	3	1	5	1	1	3	1	5	1	1	999	999	999	999	999	999	999	999	999	999	999	999	999	1	1	3	1	4.75	999
13C	1	24	1	2	0	1	3	0	1	1	3	1	5	1	1	4	1	5	1	1	3	1	5	1	1	3	1	5	1	1	5	3	5	5	5	1	1	1	1	1	1	5	5	1	1	3.25	1	5	4.71429
13C	1	24	2	1	0	1	3	0	1	1	4	1	1	1	1	3	1	5	1	1	1	1	5	1	1	4	1	5	1	1	5	3	3	5	5	1	1	1	1	1	1	5	5	1	1	3	1	4	4.42857
13D	1	23	0	0	0	1	3	0	1	3	3	1	4	4	1	4	2	3	2	2	3	2	4	1	1	3	1	2	2	1	999	999	999	999	999	999	999	999	999	999	999	999	999	2	1.6	3.25	1.5	3.25	999
13D	1	23	1	1	0	1	3	0	1	1	3	1	3	1	1	3	1	3	1	1	4	1	4	1	1	3	1	3	1	1	5	3	3	4	5	2	3	1	1	1	4	5	5	1	1	3.25	1	3.25	4.28571
13D	1	23	2	2	0	1	3	0	1	1	3	1	3	1	1	3	1	3	1	1	3	1	3	1	2	3	1	3	1	1	2	2	3	3	4	2	2	1	5	1	4	4	5	1	1.2	3	1	3	3.28571
14A	1	19	0	0	0	1	0	1	1	1	2	1	3	2	1	2	1	4	1	1	2	1	2	1	1	2	1	4	1	2	999	999	999	999	999	999	999	999	999	999	999	999	999	1.2	1.2	2	1	3.25	999
14A	1	19	1	2	0	1	0	1	1	1	4	1	4	2	1	3	1	4	2	1	3	1	4	1	1	3	1	4	1	1	1	5	2	3	2	1	3	2	1	2	4	2	5	1.4	1	3.25	1	4	2.85714
14A	1	19	2	1	0	1	0	1	1	1	4	1	5	1	1	2	1	4	1	1	4	1	3	1	1	2	1	4	1	1	5	5	5	4	5	1	4	1	1	1	2	5	5	1	1	3	1	4	4.85714
14B	1	22	0	0	0	1	1	0	1	1	4	1	3	1	1	4	1	3	1	1	4	1	4	1	1	4	1	4	1	1	999	999	999	999	999	999	999	999	999	999	999	999	999	1	1	4	1	3.5	999
14B	1	22	1	1	0	1	1	0	1	1	5	1	4	4	1	4	1	4	1	1	4	1	4	1	1	5	1	4	1	1	5	5	5	4	5	4	1	1	1	1	2	5	5	1.6	1	4.5	1	4	4.85714
14B	1	22	2	2	0	1	1	0	1	1	3	1	3	1	1	4	1	4	1	1	3	1	3	1	4	3	1	4	1	3	3	4	3	4	4	4	2	2	2	2	3	4	4	1	2	3.25	1	3.5	3.71429
14C	1	21	0	0	0	2	2	0	3	3	4	1	3	1	1	4	1	3	1	1	4	1	4	1	1	1	1	4	1	1	999	999	999	999	999	999	999	999	999	999	999	999	999	1.4	1.4	3.25	1	3.5	999
14C	1	21	1	1	0	2	2	0	1	1	5	1	5	1	1	5	1	4	1	1	5	1	4	1	1	4	1	5	1	1	5	5	4	5	5	5	2	1	1	1	1	4	5	1	1	4.75	1	4.5	4.71429
14C	1	21	2	2	0	2	2	0	3	3	3	2	2	1	3	2	1	4	4	3	3	2	4	1	2	4	1	4	1	1	2	5	2	3	3	4	3	4	4	5	5	4	4	2	2.4	3	1.5	3.5	3.28571
14D	1	24	0	0	0	1	1	1	1	1	2	1	4	1	1	1	1	1	1	1	3	1	3	1	1	3	3	3	1	1	999	999	999	999	999	999	999	999	999	999	999	999	999	1	1	2.25	1.5	2.75	999
14D	1	24	1	2	0	1	1	1	1	1	3	1	1	1	3	4	1	4	1	3	5	1	3	1	1	3	1	4	1	1	5	4	3	2	5	1	3	3	1	5	3	3	5	1	1.8	3.75	1	3	3.85714
14D	1	24	2	1	0	1	1	1	1	1	1	1	5	1	1	3	3	2	1	1	3	1	3	1	1	3	1	2	1	1	5	3	3	5	5	1	4	1	1	1	1	5	5	1	1	2.5	1.5	3	4.42857
15A	0	22	0	0	0	1	1	1	3	1	4	1	3	1	1	3	1	3	1	1	3	1	4	1	1	4	1	3	1	2	999	999	999	999	999	999	999	999	999	999	999	999	999	1.4	1.2	3.5	1	3.25	999
15A	0	22	1	2	0	1	1	1	1	1	4	1	5	1	1	4	1	3	1	1	5	1	5	1	1	5	1	4	1	1	3	5	5	5	5	1	2	1	1	1	4	4	5	1	1	4.5	1	4.25	4.57143
15A	0	22	2	2	0	1	1	1	1	1	4	1	3	1	1	4	1	3	1	1	5	1	3	1	2	5	1	4	1	1	3	5	4	5	5	1	1	1	1	1	3	3	5	1	1.2	4.5	1	3.25	4.28571
15B	0	31	0	0	0	1	0	1	1	1	3	1	2	2	1	4	1	2	3	1	3	1	3	1	1	3	1	3	2	1	999	999	999	999	999	999	999	999	999	999	999	999	999	1.8	1	3.25	1	2.5	999
15B	0	31	1	1	0	1	0	1	1	1	4	1	5	2	1	3	1	4	2	1	5	1	5	1	1	5	1	5	1	1	4	5	5	5	5	4	1	1	1	1	4	5	5	1.4	1	4.25	1	4.75	4.85714
15B	0	31	2	1	0	1	0	1	1	1	5	1	4	1	1	3	1	4	1	1	5	1	5	1	1	5	1	5	1	1	5	4	5	5	5	4	1	1	1	5	4	4	5	1	1	4.5	1	4.5	4.71429
15C	0	23	0	0	0	1	1	1	1	1	3	2	4	4	1	4	1	5	3	1	4	2	5	1	4	4	2	5	1	1	999	999	999	999	999	999	999	999	999	999	999	999	999	2	1.6	3.75	1.75	4.75	999
15C	0	23	1	1	0	1	1	1	1	1	4	1	4	2	1	4	1	5	1	1	5	2	4	1	1	4	1	5	1	1	5	5	5	5	5	3	1	1	1	1	1	5	5	1.2	1	4.25	1.25	4.5	5
15C	0	23	2	1	0	1	1	1	1	1	5	1	5	2	1	5	1	4	1	1	5	1	5	1	1	5	1	5	1	1	5	5	5	5	5	1	1	1	1	1	1	5	5	1.2	1	5	1	4.75	5
16A	0	19	0	0	0	2	3	0	1	1	3	1	3	1	1	2	1	3	1	1	2	1	4	1	1	3	1	4	1	1	999	999	999	999	999	999	999	999	999	999	999	999	999	1	1	2.5	1	3.5	999
16A	0	19	1	1	0	2	3	0	1	1	4	1	3	1	1	4	1	4	1	1	3	1	4	1	1	3	1	4	1	1	4	5	4	4	5	2	1	1	1	1	2	3	5	1	1	3.5	1	3.75	4.28571
16A	0	19	2	1	0	2	3	0	1	1	4	1	4	1	1	3	1	3	1	1	4	1	4	1	1	3	1	3	1	1	5	5	5	5	5	4	1	1	1	5	2	4	5	1	1	3.5	1	3.5	4.85714
16B	0	19	0	0	0	1	1	0	1	1	3	1	3	3	1	4	1	3	3	1	3	1	4	1	1	3	1	3	1	1	999	999	999	999	999	999	999	999	999	999	999	999	999	1.8	1	3.25	1	3.25	999
16B	0	19	1	2	0	1	1	0	1	1	3	1	2	3	1	3	1	4	3	1	3	1	2	1	1	3	1	3	1	1	4	3	4	5	4	3	2	1	1	1	4	3	4	1.8	1	3	1	2.75	3.85714
16B	0	19	2	2	0	1	1	0	1	1	2	1	2	1	1	2	1	4	1	1	3	1	3	1	1	2	1	3	1	1	3	3	4	4	4	3	2	1	1	1	4	3	5	1	1	2.25	1	3	3.71429
16C	0	20	0	0	0	2	3	0	1	1	3	1	2	1	1	2	1	2	1	1	3	1	3	1	1	2	1	2	1	1	999	999	999	999	999	999	999	999	999	999	999	999	999	1	1	2.5	1	2.25	999
16C	0	20	1	2	0	2	3	0	1	1	2	1	2	1	1	1	1	2	1	1	2	1	2	1	2	2	1	2	1	1	2	1	1	3	5	3	2	1	1	1	2	1	5	1	1.2	1.75	1	2	2.57143
16C	0	20	2	2	0	2	3	0	1	1	1	1	2	1	1	1	1	2	1	1	1	1	2	1	2	1	1	1	1	1	2	4	2	2	5	2	2	1	1	1	2	1	4	1	1.2	1	1	1.75	2.85714
16D	0	21	0	0	0	2	3	0	1	1	3	1	3	3	1	2	1	4	1	1	3	1	4	1	1	4	1	4	1	1	999	999	999	999	999	999	999	999	999	999	999	999	999	1.4	1	3	1	3.75	999
16D	0	21	1	1	0	2	3	0	1	1	4	1	4	2	1	5	1	4	1	1	5	1	4	1	1	5	1	4	1	1	5	4	4	5	5	3	1	1	1	1	4	4	5	1.2	1	4.75	1	4	4.57143
16D	0	21	2	1	0	2	3	0	1	1	4	1	5	1	1	4	1	4	1	1	5	1	5	1	1	5	1	4	1	1	5	4	5	5	5	4	1	1	1	1	3	4	5	1	1	4.5	1	4.5	4.71429
17A	0	19	0	0	0	2	1	1	1	1	3	1	3	1	1	2	1	3	1	1	3	1	4	1	1	3	1	3	1	1	999	999	999	999	999	999	999	999	999	999	999	999	999	1	1	2.75	1	3.25	999
17A	0	19	1	2	0	2	1	1	1	1	4	1	4	1	1	4	1	3	1	1	4	1	4	1	1	4	1	4	1	1	4	3	3	4	5	1	3	1	1	1	4	5	5	1	1	4	1	3.75	4.14286
17A	0	19	2	2	0	2	1	1	1	1	5	1	4	1	1	4	1	4	1	1	5	1	4	1	1	4	1	4	1	1	5	3	4	4	4	1	2	1	1	1	4	4	5	1	1	4.5	1	4	4.14286
17B	0	22	0	0	0	2	0	1	1	1	4	2	4	1	1	2	1	4	2	1	4	3	4	1	1	4	1	3	1	1	999	999	999	999	999	999	999	999	999	999	999	999	999	1.2	1	3.5	1.75	3.75	999
17B	0	22	1	1	0	2	0	1	1	1	5	1	4	1	1	4	1	4	1	1	5	1	4	1	1	4	1	4	1	1	5	5	5	5	5	4	2	2	1	2	2	5	5	1	1	4.5	1	4	5
17B	0	22	2	1	0	2	0	1	1	2	3	1	4	1	1	3	1	4	1	1	4	1	3	1	1	3	1	3	1	1	5	5	5	5	4	4	2	1	1	1	2	2	5	1	1.2	3.25	1	3.5	4.42857
17C	0	19	0	0	0	2	1	1	1	1	2	1	3	3	1	2	1	3	2	1	3	1	4	1	1	3	1	3	1	1	999	999	999	999	999	999	999	999	999	999	999	999	999	1.6	1	2.5	1	3.25	999
17C	0	19	1	1	0	2	1	1	1	1	4	1	4	2	1	3	1	3	1	1	4	1	3	1	1	3	1	3	1	1	5	4	4	4	5	1	2	1	1	1	4	2	4	1.2	1	3.5	1	3.25	4
17C	0	19	2	1	0	2	1	1	1	1	4	1	4	1	1	3	1	3	1	1	3	1	4	1	1	3	1	4	1	1	4	5	4	4	5	1	2	1	1	1	3	4	5	1	1	3.25	1	3.75	4.42857
17D	0	27	0	0	0	1	0	1	2	3	4	1	4	4	1	1	1	4	3	2	4	1	4	1	3	4	2	3	1	1	999	999	999	999	999	999	999	999	999	999	999	999	999	2.2	2	3.25	1.25	3.75	999
17D	0	27	1	2	0	1	0	1	1	2	4	1	4	4	1	2	1	4	4	2	4	1	4	3	1	3	1	4	1	1	3	1	4	4	4	1	2	1	1	1	3	4	5	2.6	1.4	3.25	1	4	3.57143
17D	0	27	2	2	0	1	0	1	2	2	4	1	4	4	1	2	1	4	4	2	4	1	4	1	1	2	1	4	1	1	3	1	4	4	3	1	2	2	1	1	2	2	5	2.4	1.4	3	1	4	3.14286
18A	0	22	0	0	1	999	1	1	1	1	3	1	4	1	1	4	1	4	1	1	4	1	5	1	1	2	1	4	1	1	999	999	999	999	999	999	999	999	999	999	999	999	999	1	1	3.25	1	4.25	999
18A	0	22	1	2	1	999	1	1	1	1	3	1	4	1	1	4	1	5	1	1	4	1	5	1	1	3	1	5	1	1	5	5	2	4	5	1	2	2	1	1	5	3	5	1	1	3.5	1	4.75	4.14286
18A	0	22	2	2	1	999	1	1	1	1	1	1	4	1	1	2	1	4	1	1	5	1	5	1	1	3	1	4	1	1	5	5	5	4	5	1	1	1	1	1	5	5	5	1	1	2.75	1	4.25	4.85714
18B	0	22	0	0	0	1	0	1	1	1	4	1	3	1	1	3	1	4	1	1	2	1	3	1	1	3	1	3	1	1	999	999	999	999	999	999	999	999	999	999	999	999	999	1	1	3	1	3.25	999
18B	0	22	1	1	0	1	0	1	1	1	3	1	4	1	1	3	1	3	1	1	4	1	4	1	1	3	1	3	1	1	5	4	3	4	5	2	3	1	1	1	2	4	5	1	1	3.25	1	3.5	4.28571
18B	0	22	2	1	0	1	0	1	1	1	3	1	4	1	1	3	1	4	1	1	3	1	3	1	1	3	1	3	1	1	4	5	4	4	5	3	3	1	1	1	2	4	5	1	1	3	1	3.5	4.42857
18C	0	22	0	0	0	2	1	1	1	1	3	1	5	2	1	1	1	5	2	1	3	1	3	1	1	3	1	2	1	1	999	999	999	999	999	999	999	999	999	999	999	999	999	1.4	1	2.5	1	3.75	999
18C	0	22	1	1	0	2	1	1	1	1	2	1	4	1	1	2	1	4	1	1	2	1	3	1	1	2	1	3	1	1	5	4	4	5	4	2	4	1	1	2	3	5	5	1	1	2	1	3.5	4.57143
18C	0	22	2	1	0	2	1	1	1	2	2	2	3	1	1	1	1	3	1	1	2	2	1	1	2	1	1	1	1	2	4	4	4	3	2	4	3	1	1	5	2	2	5	1	1.6	1.5	1.5	2	3.42857
18D	0	18	0	0	0	2	1	1	1	1	4	1	5	1	1	3	1	4	1	1	4	1	4	1	1	4	1	4	1	1	999	999	999	999	999	999	999	999	999	999	999	999	999	1	1	3.75	1	4.25	999
18D	0	18	1	2	0	2	1	1	1	1	4	2	4	1	1	3	1	3	1	1	4	1	4	1	2	4	1	4	1	1	1	5	2	3	4	4	2	2	1	3	3	2	4	1	1.2	3.75	1.25	3.75	3
18D	0	18	2	2	0	2	1	1	1	1	4	1	5	1	1	3	1	4	1	1	4	1	4	1	1	3	1	4	1	1	3	4	3	3	4	3	4	2	2	2	3	4	4	1	1	3.5	1	4.25	3.57143
19A	0	22	0	0	0	1	1	0	1	1	4	1	4	1	1	3	1	4	1	1	3	1	5	1	1	4	1	4	1	1	999	999	999	999	999	999	999	999	999	999	999	999	999	1	1	3.5	1	4.25	999
19A	0	22	1	2	0	1	1	0	1	1	4	1	4	1	1	3	1	5	1	1	4	1	5	1	1	4	1	4	1	1	2	4	2	2	4	1	2	2	1	2	1	4	5	1	1	3.75	1	4.5	3.28571
19A	0	22	2	2	0	1	1	0	1	1	3	1	3	2	1	3	1	4	1	1	3	1	4	1	2	4	1	4	1	1	2	4	1	2	2	1	2	4	1	2	2	2	5	1.2	1.2	3.25	1	3.75	2.57143
19B	0	26	0	0	0	1	0	1	2	1	3	2	3	2	1	2	1	4	2	1	4	2	4	1	2	4	1	3	1	2	999	999	999	999	999	999	999	999	999	999	999	999	999	1.6	1.4	3.25	1.5	3.5	999
19B	0	26	1	1	0	1	0	1	2	1	4	1	3	1	1	4	1	3	2	1	4	2	4	1	1	4	1	4	1	1	5	4	4	5	4	2	2	2	2	2	3	4	5	1.4	1	4	1.25	3.5	4.42857
19B	0	26	2	1	0	1	0	1	2	1	4	2	4	2	1	4	1	4	1	1	4	2	4	1	2	4	1	4	1	2	4	4	5	5	5	1	2	1	1	1	3	4	5	1.4	1.4	4	1.5	4	4.57143
19C	0	21	0	0	0	1	0	1	1	1	2	1	4	1	1	2	1	4	1	1	2	1	4	1	1	4	1	4	1	1	999	999	999	999	999	999	999	999	999	999	999	999	999	1	1	2.5	1	4	999
19C	0	21	1	1	0	1	0	1	1	1	3	1	4	2	1	2	1	4	1	1	4	1	4	1	1	4	1	4	1	1	5	5	5	5	5	2	1	1	1	1	2	2	5	1.2	1	3.25	1	4	4.57143
19C	0	21	2	1	0	1	0	1	1	1	3	1	4	1	1	2	1	4	1	1	2	1	4	1	1	4	1	4	1	1	5	5	5	5	5	2	1	1	1	1	2	5	5	1	1	2.75	1	4	5
19D	0	19	0	0	0	1	1	0	2	1	3	1	4	4	2	2	1	3	4	1	2	1	5	2	1	4	1	5	3	2	999	999	999	999	999	999	999	999	999	999	999	999	999	3	1.4	2.75	1	4.25	999
19D	0	19	1	2	0	1	1	0	2	2	3	2	2	4	2	2	1	1	3	1	1	1	3	2	2	3	1	2	2	2	2	4	4	3	2	4	1	1	1	1	2	3	2	2.6	1.8	2.25	1.25	2	2.85714
19D	0	19	2	2	0	1	1	0	2	2	1	1	2	1	1	1	1	2	1	2	3	1	3	1	3	3	1	2	1	3	2	4	3	3	4	4	1	2	1	1	1	4	2	1.2	2.2	2	1	2.25	3.14286
20A	0	27	0	0	0	1	2	1	1	1	3	1	3	2	1	2	1	4	1	1	3	1	3	1	1	3	1	4	1	1	999	999	999	999	999	999	999	999	999	999	999	999	999	1.2	1	2.75	1	3.5	999
20A	0	27	1	2	0	1	2	1	1	1	3	1	3	1	1	3	1	3	1	1	4	1	4	1	1	3	1	3	1	1	3	2	4	5	5	2	1	1	1	1	4	3	5	1	1	3.25	1	3.25	3.85714
20A	0	27	2	2	0	1	2	1	1	2	3	1	3	1	1	3	1	3	1	1	3	1	3	1	1	3	1	3	1	1	2	4	3	2	4	4	2	3	2	3	4	3	5	1	1.2	3	1	3	3.28571
20B	0	20	0	0	0	3	2	0	1	1	3	1	2	2	1	2	1	3	2	1	1	1	2	1	1	2	1	3	1	1	999	999	999	999	999	999	999	999	999	999	999	999	999	1.4	1	2	1	2.5	999
20B	0	20	1	1	0	3	2	0	1	1	2	1	3	1	1	2	1	2	1	1	2	1	2	1	1	2	1	2	1	1	4	5	4	4	1	1	3	1	1	1	4	4	5	1	1	2	1	2.25	3.85714
20B	0	20	2	1	0	3	2	0	1	1	2	1	2	1	1	1	1	3	1	1	1	1	3	1	1	1	1	3	1	1	5	5	3	4	5	1	2	1	1	1	4	5	5	1	1	1.25	1	2.75	4.57143
20C	0	19	0	0	0	2	1	0	1	1	3	1	3	1	1	3	1	3	1	1	4	1	3	1	1	3	1	3	1	1	999	999	999	999	999	999	999	999	999	999	999	999	999	1	1	3.25	1	3	999
20C	0	19	1	1	0	2	1	0	1	1	4	1	4	1	1	4	1	3	1	1	3	1	4	1	1	3	1	3	1	1	5	5	4	4	5	3	4	2	1	2	4	5	4	1	1	3.5	1	3.5	4.57143
20C	0	19	2	1	0	2	1	0	1	1	4	1	4	1	1	4	1	3	1	1	3	1	3	1	1	3	1	3	1	1	5	5	4	4	5	2	4	2	1	2	2	4	5	1	1	3.5	1	3.25	4.57143
20D	0	23	0	0	0	1	0	1	1	1	3	1	3	1	1	1	1	3	1	1	3	1	3	1	1	3	1	3	1	1	999	999	999	999	999	999	999	999	999	999	999	999	999	1	1	2.5	1	3	999
20D	0	23	1	2	0	1	0	1	1	1	2	2	3	1	1	2	1	3	1	1	2	2	3	1	1	3	1	2	1	1	1	5	1	3	4	1	2	1	1	1	1	1	5	1	1	2.25	1.5	2.75	2.85714
20D	0	23	2	2	0	1	0	1	1	1	2	2	1	2	1	2	1	3	1	1	1	2	3	1	2	2	1	3	1	1	3	1	1	2	4	4	3	3	1	3	1	2	4	1.2	1.2	1.75	1.5	2.5	2.42857
21A	0	23	0	0	0	1	2	1	1	1	3	1	4	1	1	4	1	4	1	1	4	1	5	1	1	4	1	4	1	1	999	999	999	999	999	999	999	999	999	999	999	999	999	1	1	3.75	1	4.25	999
21A	0	23	1	1	0	1	2	1	1	1	4	1	5	1	1	4	1	4	1	1	5	1	5	1	1	4	1	4	1	1	4	4	4	4	5	2	2	1	1	1	5	3	4	1	1	4.25	1	4.5	4
21A	0	23	2	1	0	1	2	1	1	1	4	1	4	1	1	4	1	5	1	1	4	1	4	1	1	4	1	4	1	1	4	4	4	4	5	1	1	1	1	1	4	4	5	1	1	4	1	4.25	4.28571
21B	0	22	0	0	0	1	2	0	1	1	3	1	3	2	1	3	1	3	2	1	4	1	4	1	1	3	1	4	1	1	999	999	999	999	999	999	999	999	999	999	999	999	999	1.4	1	3.25	1	3.5	999
21B	0	22	1	2	0	1	2	0	1	1	3	2	3	1	1	3	1	4	1	1	3	1	4	1	1	3	1	3	1	1	4	5	4	5	5	2	1	1	2	2	4	4	5	1	1	3	1.25	3.5	4.57143
21B	0	22	2	2	0	1	2	0	1	1	3	2	4	1	1	2	1	3	1	1	3	1	3	1	1	3	1	2	1	1	2	4	5	4	4	1	2	2	2	1	3	2	5	1	1	2.75	1.25	3	3.71429
21C	0	21	0	0	0	1	2	0	1	1	4	1	3	2	1	2	1	3	1	1	3	1	3	1	1	3	1	3	1	1	999	999	999	999	999	999	999	999	999	999	999	999	999	1.2	1	3	1	3	999
21C	0	21	1	2	0	1	2	0	1	1	5	1	4	3	1	4	1	3	1	1	5	1	5	1	2	5	1	4	1	1	4	5	1	4	5	3	1	1	1	1	5	4	5	1.4	1.2	4.75	1	4	4
21C	0	21	2	2	0	1	2	0	1	1	5	2	5	1	1	5	1	4	1	1	5	1	5	1	2	5	1	4	1	1	2	5	4	5	4	1	1	1	1	1	2	3	5	1	1.2	5	1.25	4.5	4
21D	0	18	0	0	0	1	0	1	1	2	3	1	3	2	1	2	1	2	2	1	3	1	3	2	1	3	1	3	2	1	999	999	999	999	999	999	999	999	999	999	999	999	999	1.8	1.2	2.75	1	2.75	999
21D	0	18	1	1	0	1	0	1	1	2	4	1	3	2	1	4	1	2	2	1	4	1	4	1	1	4	1	3	1	1	5	5	5	5	5	3	2	1	1	1	4	4	5	1.4	1.2	4	1	3	4.85714
21D	0	18	2	1	0	1	0	1	1	1	4	1	4	1	1	4	1	3	1	1	4	1	4	1	1	3	1	3	1	1	5	5	5	5	5	3	1	1	1	1	1	5	5	1	1	3.75	1	3.5	5
22A	1	22	0	0	0	3	0	1	1	1	3	1	4	1	1	4	1	4	1	1	4	1	5	1	1	4	1	4	1	1	999	999	999	999	999	999	999	999	999	999	999	999	999	1	1	3.75	1	4.25	999
22A	1	22	1	1	0	3	0	1	1	1	4	1	4	1	1	1	1	5	1	1	4	1	4	1	1	4	1	5	1	1	5	4	4	5	5	1	2	1	1	1	4	4	5	1	1	3.25	1	4.5	4.57143
22A	1	22	2	1	0	3	0	1	1	1	4	1	4	1	1	1	1	5	1	1	5	1	4	1	1	4	1	5	1	1	5	4	4	4	5	1	2	1	1	1	2	4	5	1	1	3.5	1	4.5	4.42857
22B	1	26	0	0	0	2	0	1	3	1	4	1	5	1	1	4	1	5	3	5	4	1	4	1	1	4	1	4	1	1	999	999	999	999	999	999	999	999	999	999	999	999	999	1.8	1.8	4	1	4.5	999
22B	1	26	1	2	0	2	0	1	1	1	5	1	4	1	1	4	1	5	1	1	4	1	4	1	2	4	1	5	1	1	4	4	4	5	4	1	1	2	1	1	1	4	5	1	1.2	4.25	1	4.5	4.28571
22B	1	26	2	2	0	2	0	1	1	1	5	1	4	1	1	5	1	5	1	1	4	1	4	1	2	4	1	5	1	1	3	4	3	4	3	1	1	2	1	2	1	3	5	1	1.2	4.5	1	4.5	3.57143
22C	1	31	0	0	0	1	0	1	1	1	4	1	4	2	1	3	1	4	1	1	4	1	4	1	1	3	1	4	1	1	999	999	999	999	999	999	999	999	999	999	999	999	999	1.2	1	3.5	1	4	999
22C	1	31	1	2	0	1	0	1	1	1	5	1	4	1	1	4	1	4	1	1	5	1	4	1	1	4	1	4	1	1	2	1	2	5	5	1	1	1	1	1	4	4	5	1	1	4.5	1	4	3.42857
22C	1	31	2	2	0	1	0	1	1	1	4	1	4	1	1	3	1	4	1	1	4	1	4	1	1	4	1	4	1	1	1	2	2	3	4	1	1	1	1	1	4	1	5	1	1	3.75	1	4	2.57143
22D	1	24	0	0	0	2	0	1	1	1	4	1	4	3	1	3	1	4	3	1	5	1	4	1	1	3	1	3	1	1	999	999	999	999	999	999	999	999	999	999	999	999	999	1.8	1	3.75	1	3.75	999
22D	1	24	1	1	0	2	0	1	1	1	4	1	5	1	1	4	1	4	2	1	4	1	4	1	1	5	1	4	1	1	4	5	4	5	5	2	3	1	1	1	3	5	5	1.2	1	4.25	1	4.25	4.71429
22D	1	24	2	1	0	2	0	1	1	1	4	1	5	1	1	4	1	4	1	1	4	1	4	1	1	4	1	5	1	1	5	5	5	4	5	2	1	1	1	1	1	5	5	1	1	4	1	4.5	4.85714
23A	1	23	0	0	0	2	0	1	1	1	3	2	3	1	1	1	1	2	1	1	1	1	1	1	1	1	1	1	1	1	999	999	999	999	999	999	999	999	999	999	999	999	999	1	1	1.5	1.25	1.75	999
23A	1	23	1	2	0	2	0	1	2	2	1	3	1	1	1	1	1	1	1	1	1	3	1	1	2	1	2	1	1	2	1	5	1	2	3	4	5	3	2	4	3	2	3	1.2	1.6	1	2.25	1	2.42857
23A	1	23	2	2	0	2	0	1	2	2	1	2	1	1	1	1	1	1	1	2	1	2	1	1	2	1	2	1	1	1	1	1	1	1	2	4	4	3	4	4	2	2	2	1.2	1.6	1	1.75	1	1.42857
23B	1	18	0	0	0	2	0	1	1	1	3	2	4	3	2	3	2	3	4	1	4	2	3	2	2	3	2	3	2	2	999	999	999	999	999	999	999	999	999	999	999	999	999	2.4	1.6	3.25	2	3.25	999
23B	1	18	1	1	0	2	0	1	1	1	4	2	4	3	1	4	1	4	2	2	3	2	4	2	2	3	2	4	2	2	3	3	3	4	4	3	3	3	2	2	4	5	5	2	1.6	3.5	1.75	4	3.85714
23B	1	18	2	1	0	2	0	1	1	1	4	2	4	2	1	2	1	3	1	2	4	4	5	2	3	4	2	4	2	1	5	5	5	4	4	2	3	2	2	2	4	4	4	1.6	1.6	3.5	2.25	4	4.42857
23C	1	26	0	0	0	1	0	1	4	1	4	1	4	2	1	3	1	4	2	1	5	1	4	1	2	4	1	4	1	1	999	999	999	999	999	999	999	999	999	999	999	999	999	2	1.2	4	1	4	999
23C	1	26	1	1	0	1	0	1	1	1	4	1	4	3	1	4	1	4	4	1	4	1	4	2	1	3	1	4	1	1	5	5	5	5	5	5	3	1	1	1	4	5	5	2.2	1	3.75	1	4	5
23C	1	26	2	1	0	1	0	1	1	1	4	1	4	2	1	4	1	4	3	1	4	1	4	1	2	4	1	4	1	1	5	5	5	5	5	5	3	1	1	1	4	4	5	1.6	1.2	4	1	4	4.85714
23D	1	23	0	0	0	1	0	1	2	1	3	1	3	2	1	2	1	2	2	1	3	1	2	1	1	3	1	2	1	1	999	999	999	999	999	999	999	999	999	999	999	999	999	1.6	1	2.75	1	2.25	999
23D	1	23	1	2	0	1	0	1	2	2	1	4	1	2	1	2	1	2	1	1	2	1	2	1	2	2	1	2	1	1	1	4	1	1	3	2	4	2	3	2	4	2	4	1.4	1.4	1.75	1.75	1.75	2.28571
23D	1	23	2	2	0	1	0	1	1	2	2	2	1	1	1	2	1	1	2	1	1	2	2	1	3	1	2	1	1	1	1	2	2	1	2	2	3	4	1	4	4	4	4	1.2	1.6	1.5	1.75	1.25	2.28571
24A	0	21	0	0	0	1	0	1	1	1	1	1	3	1	1	2	1	3	1	1	4	1	4	1	1	3	1	3	1	1	999	999	999	999	999	999	999	999	999	999	999	999	999	1	1	2.5	1	3.25	999
24A	0	21	1	2	0	1	0	1	1	1	4	1	3	1	1	4	1	4	1	1	5	1	4	1	1	4	1	4	1	1	4	4	3	5	3	1	2	3	1	3	5	3	5	1	1	4.25	1	3.75	3.85714
24A	0	21	2	1	0	1	0	1	1	1	5	1	5	1	1	5	1	5	1	1	5	1	5	1	1	5	1	5	1	1	5	5	5	5	4	1	1	1	1	1	5	3	5	1	1	5	1	5	4.57143
24B	0	22	0	0	0	2	1	1	2	1	3	1	3	2	1	2	1	3	2	1	2	1	2	1	1	3	1	3	1	2	999	999	999	999	999	999	999	999	999	999	999	999	999	1.6	1.2	2.5	1	2.75	999
24B	0	22	1	1	0	2	1	1	2	1	4	1	4	2	1	4	1	3	1	1	4	1	4	1	1	4	1	4	1	1	5	5	4	4	4	1	3	1	1	1	4	4	5	1.4	1	4	1	3.75	4.42857
24B	0	22	2	2	0	2	1	1	1	1	5	1	4	1	1	4	1	4	1	1	4	1	5	1	1	5	1	4	1	1	4	5	4	5	4	1	3	1	1	1	4	4	5	1	1	4.5	1	4.25	4.42857
24D	0	21	0	0	0	1	0	1	2	2	3	1	4	2	2	3	1	4	1	2	3	1	4	2	2	4	1	4	1	2	999	999	999	999	999	999	999	999	999	999	999	999	999	1.6	2	3.25	1	4	999
24D	0	21	1	2	0	1	0	1	2	3	3	2	3	1	1	2	1	4	1	2	3	2	3	1	2	3	1	3	1	1	2	2	2	3	4	2	3	1	1	2	4	2	5	1.2	1.8	2.75	1.5	3.25	2.85714
24D	0	21	2	1	0	1	0	1	2	1	5	1	4	1	1	5	1	4	1	1	4	1	4	1	1	4	1	4	1	1	4	4	4	5	5	3	2	1	1	1	3	4	5	1.2	1	4.5	1	4	4.42857
25A	0	21	0	0	0	1	1	1	1	1	5	1	3	1	1	4	1	4	1	1	5	1	5	1	1	1	1	4	1	1	999	999	999	999	999	999	999	999	999	999	999	999	999	1	1	3.75	1	4	999
25A	0	21	1	1	0	1	1	1	1	1	1	1	5	1	1	4	1	4	1	1	5	1	5	1	1	5	1	4	1	1	5	5	4	5	5	2	2	2	1	1	4	2	5	1	1	3.75	1	4.5	4.42857
25A	0	21	2	1	0	1	1	1	1	1	5	1	5	1	1	5	1	5	1	1	5	1	5	1	1	5	1	5	1	1	5	5	5	5	5	2	2	2	1	5	3	2	5	1	1	5	1	5	4.57143
25B	0	22	0	0	0	1	1	1	1	1	4	1	4	4	1	2	1	4	1	1	2	1	4	1	1	3	1	4	1	1	999	999	999	999	999	999	999	999	999	999	999	999	999	1.6	1	2.75	1	4	999
25B	0	22	1	2	0	1	1	1	3	1	4	1	4	1	1	3	1	4	1	1	4	1	4	1	2	4	1	4	1	1	1	5	2	3	3	4	2	3	1	3	3	3	5	1.4	1.2	3.75	1	4	3.14286
25B	0	22	2	2	0	1	1	1	1	2	4	1	4	1	1	4	1	4	1	1	4	1	4	1	3	4	1	4	1	1	1	5	1	2	3	4	2	3	1	3	4	3	5	1	1.6	4	1	4	2.85714
25C	0	21	0	0	0	1	1	1	1	1	4	1	4	2	1	1	1	5	2	1	5	1	5	1	1	4	1	4	1	1	999	999	999	999	999	999	999	999	999	999	999	999	999	1.4	1	3.5	1	4.5	999
25C	0	21	1	2	0	1	1	1	1	1	5	1	5	1	1	1	1	5	1	1	5	3	5	1	1	5	1	4	1	1	2	5	2	3	4	1	2	2	1	2	2	2	3	1	1	4	1.5	4.75	3
25C	0	21	2	2	0	1	1	1	1	1	5	1	5	2	1	1	1	5	1	1	5	1	5	1	2	5	1	5	1	1	4	5	4	3	4	1	2	2	1	2	3	4	4	1.2	1.2	4	1	5	4
25D	0	23	0	0	0	1	1	1	2	2	3	2	4	2	1	4	1	4	3	1	5	1	5	2	1	4	1	3	2	2	999	999	999	999	999	999	999	999	999	999	999	999	999	2.2	1.4	4	1.25	4	999
25D	0	23	1	1	0	1	1	1	1	1	4	1	4	1	1	4	1	4	2	1	5	1	5	1	1	5	1	5	1	1	5	4	5	5	5	5	2	1	1	1	4	5	5	1.2	1	4.5	1	4.5	4.85714
25D	0	23	2	1	0	1	1	1	1	1	5	1	5	1	1	5	1	5	2	1	4	1	4	1	1	4	1	4	1	2	5	5	5	5	5	5	2	2	1	1	4	4	5	1.2	1.2	4.5	1	4.5	4.85714
26A	0	22	0	0	0	1	0	1	2	1	1	2	2	1	1	1	1	2	1	1	1	2	4	1	1	1	1	3	1	1	999	999	999	999	999	999	999	999	999	999	999	999	999	1.2	1	1	1.5	2.75	999
26A	0	22	1	1	0	1	0	1	1	1	3	1	3	1	1	2	1	2	1	1	2	1	4	1	1	3	1	3	1	1	5	4	4	3	4	3	4	4	3	5	2	5	4	1	1	2.5	1	3	4.14286
26A	0	22	2	1	0	1	0	1	1	1	3	1	3	1	1	3	1	3	1	1	4	1	4	1	1	3	1	4	1	1	5	4	4	3	2	3	5	4	4	5	3	5	4	1	1	3.25	1	3.5	3.85714
26B	0	23	0	0	0	1	0	1	1	1	2	1	5	1	1	2	1	5	1	1	2	1	3	1	1	2	1	3	1	1	999	999	999	999	999	999	999	999	999	999	999	999	999	1	1	2	1	4	999
26B	0	23	1	2	0	1	0	1	1	1	2	1	2	1	1	2	1	3	1	1	2	1	3	1	2	2	1	3	1	1	1	5	1	2	2	1	5	3	1	4	1	2	5	1	1.2	2	1	2.75	2.57143
26B	0	23	2	2	0	1	0	1	1	1	2	1	2	1	1	1	1	3	1	1	2	1	3	1	1	1	1	2	1	1	1	5	1	1	2	1	5	4	1	4	1	2	4	1	1	1.5	1	2.5	2.28571
26C	0	19	0	0	0	1	0	1	3	5	2	1	2	1	4	1	3	3	1	4	3	3	3	3	4	2	4	2	1	1	999	999	999	999	999	999	999	999	999	999	999	999	999	1.8	3.6	2	2.75	2.5	999
26C	0	19	1	2	0	1	0	1	3	3	1	1	1	1	4	1	1	1	1	4	2	2	1	1	1	1	1	1	1	1	5	1	1	5	4	1	1	1	1	3	5	1	1	1.4	2.6	1.25	1.25	1	2.57143
26C	0	19	2	2	0	1	0	1	1	1	1	1	2	1	3	1	1	1	1	2	1	1	1	1	1	1	1	1	1	1	4	2	5	3	5	1	4	2	5	5	3	1	1	1	1.6	1	1	1.25	3
26D	0	19	0	0	0	1	0	1	2	1	3	2	3	1	1	1	1	2	1	2	2	1	2	1	1	1	1	1	1	1	999	999	999	999	999	999	999	999	999	999	999	999	999	1.2	1.2	1.75	1.25	2	999
26D	0	19	1	1	0	1	0	1	1	1	4	1	2	1	1	2	1	3	1	1	2	1	4	1	1	2	1	4	1	1	4	4	4	4	5	1	2	1	1	1	4	4	4	1	1	2.5	1	3.25	4.14286
26D	0	19	2	1	0	1	0	1	1	1	4	1	2	1	1	2	1	2	1	1	2	1	4	1	1	1	1	4	1	1	4	4	4	4	1	5	2	5	5	1	4	2	4	1	1	2.25	1	3	3.28571
27A	0	22	0	0	1	999	1	1	1	1	3	1	4	1	1	3	1	4	1	1	3	1	4	1	1	3	1	3	1	1	999	999	999	999	999	999	999	999	999	999	999	999	999	1	1	3	1	3.75	999
27A	0	22	1	2	1	999	1	1	1	1	4	2	4	2	2	4	1	4	1	1	4	1	4	1	1	4	1	4	1	1	2	5	2	3	4	2	2	2	2	2	4	4	5	1.2	1.2	4	1.25	4	3.57143
27A	0	22	2	2	1	999	1	1	1	1	5	2	2	1	1	4	1	4	1	1	4	1	3	1	1	5	1	4	1	1	2	4	2	2	3	1	2	3	2	4	4	4	5	1	1	4.5	1.25	3.25	3.14286
27B	0	23	0	0	0	1	1	1	1	1	4	1	4	3	1	4	1	4	4	1	4	1	4	1	1	5	1	5	1	1	999	999	999	999	999	999	999	999	999	999	999	999	999	2	1	4.25	1	4.25	999
27B	0	23	1	1	0	1	1	1	1	1	5	1	4	1	1	4	1	4	4	1	5	1	4	1	1	4	1	4	1	1	5	4	5	5	5	4	1	1	1	1	2	4	5	1.6	1	4.5	1	4	4.71429
27B	0	23	2	1	0	1	1	1	1	1	5	1	4	1	1	4	1	4	1	1	5	1	4	1	1	4	1	4	1	1	5	5	5	5	5	2	1	1	1	1	1	5	5	1	1	4.5	1	4	5
27C	0	21	0	0	0	3	1	1	1	1	3	1	4	1	1	3	1	4	1	1	4	1	4	1	1	3	1	4	1	1	999	999	999	999	999	999	999	999	999	999	999	999	999	1	1	3.25	1	4	999
27C	0	21	1	1	0	3	1	1	1	1	4	1	4	1	1	4	1	4	1	1	4	1	4	1	1	4	1	4	1	1	5	4	5	5	5	1	2	1	1	1	2	5	5	1	1	4	1	4	4.85714
27C	0	21	2	1	0	3	1	1	1	1	4	1	4	1	1	4	1	4	1	1	4	1	4	1	1	4	1	4	1	1	5	5	5	5	5	3	2	1	1	1	1	5	5	1	1	4	1	4	5
27D	0	26	0	0	0	1	1	1	1	1	4	2	3	4	1	4	1	4	4	1	4	2	4	1	1	5	1	5	3	1	999	999	999	999	999	999	999	999	999	999	999	999	999	2.6	1	4.25	1.5	4	999
27D	0	26	1	2	0	1	1	1	1	1	4	1	3	2	1	3	1	4	2	1	5	2	4	1	2	4	1	4	1	1	3	5	4	4	5	4	1	3	2	1	4	4	5	1.4	1.2	4	1.25	3.75	4.28571
27D	0	26	2	2	0	1	1	1	1	1	3	2	3	2	1	3	1	4	2	1	4	2	4	1	2	4	1	3	1	1	3	1	1	4	5	2	1	1	2	2	5	4	4	1.4	1.2	3.5	1.5	3.5	3.14286
28A	1	23	0	0	0	1	1	0	1	1	4	1	3	1	1	4	1	3	1	1	4	1	3	1	1	4	1	5	1	1	999	999	999	999	999	999	999	999	999	999	999	999	999	1	1	4	1	3.5	999
28A	1	23	1	2	0	1	1	0	1	2	3	1	3	3	1	3	1	3	2	1	3	1	2	1	2	3	1	3	1	1	3	4	3	3	5	1	2	1	1	1	2	1	4	1.6	1.4	3	1	2.75	3.28571
28A	1	23	2	2	0	1	1	0	1	2	2	1	2	2	1	2	1	3	1	1	2	1	2	1	2	1	1	2	1	1	3	5	3	3	5	3	1	1	1	3	3	1	5	1.2	1.4	1.75	1	2.25	3.57143
28B	1	20	0	0	0	3	0	1	1	1	4	1	4	1	1	1	1	4	1	1	4	1	5	1	1	4	1	5	1	1	999	999	999	999	999	999	999	999	999	999	999	999	999	1	1	3.25	1	4.5	999
28B	1	20	1	1	0	3	0	1	1	1	3	1	4	1	1	3	1	4	1	1	4	1	5	1	1	5	1	5	1	1	4	5	5	4	5	1	2	1	1	1	2	4	5	1	1	3.75	1	4.5	4.57143
28B	1	20	2	1	0	3	0	1	1	1	4	1	5	1	1	3	1	4	1	1	3	1	5	1	1	4	1	5	1	1	4	4	5	4	5	1	2	1	1	1	2	4	5	1	1	3.5	1	4.75	4.42857
28C	1	27	0	0	0	1	0	1	1	1	2	1	1	1	1	2	1	3	1	1	3	1	4	1	1	1	1	4	1	1	999	999	999	999	999	999	999	999	999	999	999	999	999	1	1	2	1	3	999
28C	1	27	1	1	0	1	0	1	1	1	3	1	3	2	1	3	1	3	1	1	3	1	3	1	1	5	1	3	1	1	4	3	4	3	5	1	3	1	1	1	2	4	5	1.2	1	3.5	1	3	4
28C	1	27	2	1	0	1	0	1	1	1	3	1	4	2	1	3	1	3	1	1	3	1	3	1	1	4	1	3	1	1	4	3	4	3	5	1	3	1	1	1	1	4	5	1.2	1	3.25	1	3.25	4
28D	1	24	0	0	0	3	0	1	1	1	3	1	4	1	1	2	1	2	1	1	3	1	4	1	1	3	1	3	1	1	999	999	999	999	999	999	999	999	999	999	999	999	999	1	1	2.75	1	3.25	999
28D	1	24	1	2	0	3	0	1	1	1	3	1	3	1	1	3	1	3	1	1	3	2	4	1	2	3	1	3	1	1	1	5	1	2	2	2	3	4	1	4	1	4	5	1	1.2	3	1.25	3.25	2.85714
28D	1	24	2	2	0	3	0	1	1	1	3	1	2	1	1	3	1	3	1	1	3	2	3	1	2	3	1	3	1	1	1	5	1	2	1	2	3	5	3	5	1	4	5	1	1.2	3	1.25	2.75	2.71429
29A	0	24	0	0	0	1	2	1	1	1	3	1	4	2	1	1	1	5	1	1	4	1	5	1	1	5	1	5	1	1	999	999	999	999	999	999	999	999	999	999	999	999	999	1.2	1	3.25	1	4.75	999
29A	0	24	1	2	0	1	2	1	1	1	5	1	5	1	1	1	1	5	1	1	5	1	5	1	1	5	1	5	1	1	4	3	5	5	5	1	5	1	1	1	1	5	5	1	1	4	1	5	4.57143
29A	0	24	2	1	0	1	2	1	1	1	5	1	5	1	1	3	1	5	1	1	5	1	5	1	1	5	1	5	1	1	5	4	5	5	5	1	1	1	1	1	3	5	5	1	1	4.5	1	5	4.85714
29B	0	24	0	0	0	1	0	1	1	1	3	1	3	1	2	3	1	3	1	1	4	1	5	1	1	4	1	3	1	3	999	999	999	999	999	999	999	999	999	999	999	999	999	1	1.6	3.5	1	3.5	999
29B	0	24	1	1	0	1	0	1	1	1	5	1	4	1	1	5	1	4	1	1	4	1	5	1	1	5	1	5	1	1	5	5	5	5	4	2	3	1	1	2	4	4	5	1	1	4.75	1	4.5	4.71429
29B	0	24	2	2	0	1	0	1	1	1	5	1	4	1	1	5	1	4	1	1	5	1	5	1	1	5	1	5	1	1	5	5	4	5	4	2	4	2	3	2	3	4	5	1	1	5	1	4.5	4.57143
29C	0	23	0	0	0	1	2	1	1	1	5	1	5	1	1	4	1	5	1	1	5	1	5	1	1	5	1	4	1	1	999	999	999	999	999	999	999	999	999	999	999	999	999	1	1	4.75	1	4.75	999
29C	0	23	1	1	0	1	2	1	1	1	5	1	5	1	1	5	1	5	1	1	5	1	5	1	1	5	1	4	1	1	5	5	5	5	5	4	3	1	1	1	2	4	5	1	1	5	1	4.75	4.85714
29C	0	23	2	2	0	1	2	1	1	2	5	2	1	1	1	5	1	4	1	1	5	1	5	1	3	5	1	4	1	1	1	5	1	1	5	4	3	4	1	4	1	1	5	1	1.6	5	1.25	3.5	2.71429
29D	0	22	0	0	0	3	2	0	1	1	3	1	4	1	1	2	1	3	1	1	4	1	5	1	1	3	1	4	1	1	999	999	999	999	999	999	999	999	999	999	999	999	999	1	1	3	1	4	999
29D	0	22	1	2	0	3	2	0	1	1	3	1	3	1	1	3	1	4	1	1	5	1	4	1	1	4	1	5	1	1	4	4	3	4	3	1	2	3	1	3	4	4	5	1	1	3.75	1	4	3.85714
29D	0	22	2	1	0	3	2	0	1	1	5	1	5	1	1	5	1	5	1	1	5	1	5	1	1	3	1	5	1	1	5	4	4	5	3	1	2	3	1	3	4	5	5	1	1	4.5	1	5	4.42857
30A	0	18	0	0	0	2	1	1	2	1	4	1	4	2	1	3	1	5	2	1	4	1	4	1	1	4	1	4	1	1	999	999	999	999	999	999	999	999	999	999	999	999	999	1.6	1	3.75	1	4.25	999
30A	0	18	1	1	0	2	1	1	1	1	4	1	4	1	1	4	1	4	1	1	4	1	4	1	1	4	1	4	1	1	4	4	4	4	5	2	2	1	1	1	3	3	5	1	1	4	1	4	4.14286
30A	0	18	2	1	0	2	1	1	1	1	4	1	4	1	1	4	1	4	1	1	4	1	4	1	1	4	1	4	1	1	4	4	4	4	5	5	2	1	1	1	4	3	5	1	1	4	1	4	4.14286
30B	0	18	0	0	0	1	1	0	1	1	3	1	3	2	1	1	1	3	1	1	2	1	4	1	1	2	1	2	1	1	999	999	999	999	999	999	999	999	999	999	999	999	999	1.2	1	2	1	3	999
30B	0	18	1	2	0	1	1	0	1	1	2	2	2	1	1	2	1	2	1	1	3	1	3	1	1	2	1	3	1	1	1	4	2	2	4	1	1	1	1	1	2	2	5	1	1	2.25	1.25	2.5	2.85714
30B	0	18	2	2	0	1	1	0	1	1	3	1	3	1	1	2	1	2	1	1	2	1	3	1	1	2	1	3	1	1	3	4	4	4	4	2	1	1	1	2	4	4	5	1	1	2.25	1	2.75	4
30C	0	18	0	0	0	1	3	0	1	1	2	1	3	1	1	2	1	3	1	1	2	1	3	1	1	2	1	2	1	1	999	999	999	999	999	999	999	999	999	999	999	999	999	1	1	2	1	2.75	999
30C	0	18	1	2	0	1	3	0	1	1	3	1	2	2	1	2	1	3	1	1	2	1	2	1	2	2	1	2	1	1	2	4	2	2	3	2	1	3	1	3	4	4	4	1.2	1.2	2.25	1	2.25	3
30C	0	18	2	2	0	1	3	0	1	1	3	1	3	2	1	2	1	3	1	1	3	1	3	1	1	3	1	2	1	1	3	3	3	4	4	3	1	2	2	2	3	4	5	1.2	1	2.75	1	2.75	3.71429
30D	0	19	0	0	0	1	1	1	1	1	2	1	2	1	1	2	1	2	1	1	2	1	2	1	1	2	1	2	1	1	999	999	999	999	999	999	999	999	999	999	999	999	999	1	1	2	1	2	999
30D	0	19	1	1	0	1	1	1	1	1	3	1	3	1	1	2	1	2	1	1	2	1	2	1	1	3	1	3	1	1	3	4	3	4	4	2	4	1	1	2	4	3	5	1	1	2.5	1	2.5	3.71429
30D	0	19	2	1	0	1	1	1	1	1	3	1	3	1	1	1	1	2	1	1	3	1	3	1	1	1	1	3	1	1	4	3	4	4	5	1	4	1	1	1	4	4	5	1	1	2	1	2.75	4.14286
31A	1	18	0	0	0	1	1	0	1	1	2	1	2	3	1	2	1	2	2	1	2	1	2	1	1	2	1	3	1	1	999	999	999	999	999	999	999	999	999	999	999	999	999	1.6	1	2	1	2.25	999
31A	1	18	1	1	0	1	1	0	1	1	3	1	3	3	1	2	1	2	3	1	3	1	3	1	1	3	1	2	1	1	5	5	2	4	5	2	1	1	1	1	5	4	5	1.8	1	2.75	1	2.5	4.28571
31A	1	18	2	2	0	1	1	0	1	2	2	1	3	4	1	3	1	3	3	1	3	1	2	1	2	3	1	3	1	1	3	5	4	4	5	2	1	1	1	1	1	3	5	2	1.4	2.75	1	2.75	4.14286
31B	1	21	0	0	0	2	1	0	1	1	1	1	4	2	1	3	1	4	1	1	3	1	4	1	1	3	1	4	1	1	999	999	999	999	999	999	999	999	999	999	999	999	999	1.2	1	2.5	1	4	999
31B	1	21	1	2	0	2	1	0	1	1	2	1	4	3	1	3	1	4	1	1	3	1	4	1	1	3	1	4	1	1	2	4	3	4	4	1	1	2	1	2	2	3	5	1.4	1	2.75	1	4	3.57143
31B	1	21	2	1	0	2	1	0	1	1	2	1	4	3	1	3	1	4	1	1	4	1	4	1	1	4	1	4	1	1	5	4	4	5	5	1	1	1	1	5	3	4	5	1.4	1	3.25	1	4	4.57143
31C	1	25	0	0	0	1	1	0	1	1	2	1	1	1	1	1	1	1	1	1	2	1	1	1	1	1	1	1	1	1	999	999	999	999	999	999	999	999	999	999	999	999	999	1	1	1.5	1	1	999
31C	1	25	1	2	0	1	1	0	1	1	3	1	2	1	1	3	1	1	1	1	3	1	1	1	2	2	1	1	1	1	1	5	1	3	4	1	1	1	1	2	3	1	5	1	1.2	2.75	1	1.25	2.85714
31C	1	25	2	1	0	1	1	0	1	1	3	1	3	1	1	2	1	1	1	1	2	1	1	1	1	2	1	1	1	1	5	5	5	5	5	1	1	1	1	1	3	5	5	1	1	2.25	1	1.5	5
31D	1	19	0	0	0	1	1	0	1	1	3	1	4	1	1	3	1	4	1	1	4	1	4	1	1	4	1	4	1	1	999	999	999	999	999	999	999	999	999	999	999	999	999	1	1	3.5	1	4	999
31D	1	19	1	1	0	1	1	0	1	1	5	1	5	1	1	4	1	4	1	1	5	1	4	1	1	5	1	4	1	1	4	5	4	5	5	2	1	1	1	1	2	4	5	1	1	4.75	1	4.25	4.57143
31D	1	19	2	2	0	1	1	0	1	2	4	1	3	1	1	2	1	4	1	2	3	1	3	1	3	4	1	3	1	1	3	3	3	4	4	2	1	1	1	2	4	5	5	1	1.8	3.25	1	3.25	3.85714
[truncated: 2 more columns]
